# Supplementary material for: Safety Evaluation of Employing Temporal Interference Transcranial Alternating Current Stimulation in Human Studies
Source: MDPI journal article supplement (doi:10.3390/brainsci12091194), 2022-09-05
Supplement: s1 [file s1]

# Supplementary Material

## 1. Supplemental Tables

**Table S1.** The statistical results of the relative change percentages of the neurological and neuropsychological measurements.

| Measurements  | Active group |                | Sham group |                | Statistical results |          |
|---------------|--------------|----------------|------------|----------------|---------------------|----------|
| (Percentage)  | Mean         | Std. Deviation | Mean       | Std. Deviation | <i>t</i>            | <i>p</i> |
| MoCA          | 101.1367     | 6.26467        | 99.2815    | 6.14744        | 0.826               | 0.415    |
| PPT           |              |                |            |                |                     |          |
| Right Hand    | 96.0281      | 8.69495        | 92.4800    | 5.29532        | 1.494               | 0.144    |
| Left Hand     | 94.8667      | 5.08215        | 93.9180    | 3.66091        | 0.385               | 0.702    |
| Both Hands    | 95.4720      | 6.98211        | 94.1336    | 5.53225        | 0.788               | 0.436    |
| Assembly      | 90.4438      | 6.74597        | 90.6322    | 7.74358        | 0.082               | 0.935    |
| A-CalCAP      |              |                |            |                |                     |          |
| SRT           | 102.8644     | 20.57278       | 98.0103    | 12.44376       | 0.828               | 0.413    |
| CRT           | 97.5547      | 7.41878        | 98.4706    | 5.92510        | -0.373              | 0.711    |
| SPM1          | 98.4185      | 10.58960       | 101.7780   | 8.11183        | -0.949              | 0.349    |
| SPM2          | 110.0147     | 12.01190       | 104.3717   | 11.79393       | 1.474               | 0.149    |
| NSE           | 89.0789      | 18.31330       | 99.0326    | 32.71433       | -1.29               | 0.207    |
| VAMS-R        |              |                |            |                |                     |          |
| Sad           | 155.9458     | 199.38242      | 135.7785   | 169.23709      | 0.336               | 0.739    |
| Confused      | 719.4068     | 1930.71287     | 549.7241   | 1000.58966     | 0.34                | 0.736    |
| Afraid        | 684.7576     | 2299.92278     | 194.6379   | 351.71878      | 0.913               | 0.367    |
| Happy         | 185.2106     | 293.18436      | 638.6090   | 2293.08975     | -0.873              | 0.389    |
| Tired         | 219.8437     | 382.63089      | 240.3417   | 407.93678      | -0.121              | 0.904    |
| Angry         | 143.5114     | 189.73218      | 104.8591   | 124.22770      | 0.824               | 0.415    |
| Tense         | 809.6006     | 2281.36638     | 203.7102   | 224.67066      | 1.187               | 0.243    |
| Energetic     | 140.3178     | 104.12713      | 173.8018   | 126.51480      | -1.62               | 0.114    |
| SAS           |              |                |            |                |                     |          |
| Concentration | 118.4211     | 28.81119       | 105.5263   | 18.67570       | 1.492               | 0.144    |

|                   |          |          |          |          |       |       |
|-------------------|----------|----------|----------|----------|-------|-------|
| Calmness          | 113.8596 | 37.94511 | 107.8070 | 32.81567 | 0.526 | 0.602 |
| Fatigue           | 90.8772  | 36.99503 | 76.8421  | 28.88833 | 1.521 | 0.137 |
| Visual perception | 110.0877 | 15.36062 | 106.2281 | 31.54383 | 0.265 | 0.793 |

The differences of the percentages (percentage =  $100 * \text{pre\_test\_value} / \text{post\_test\_value}$ ) between the 2 groups were tested by independent T-tests. As shown in the table, all the *ps* are larger than 0.05. These results are consistent with our statistical results that calculated with the original measure values in the Table 1. NSE: Serum neuron-specific enolase; MoCA: Montreal Cognitive Assessment; A-CalCAP: an abbreviated version of the California Computerized Assessment Package; PPT: Purdue Pegboard Test; VAMS-R: revised version of the Visual Analog Mood Scale; SAS: self-assessment scale.

**Table S2.** The statistical results of EEG band powers.

| Channels | Frequency bands |          |          |          |          |          |          |          |           |          |           |          |
|----------|-----------------|----------|----------|----------|----------|----------|----------|----------|-----------|----------|-----------|----------|
|          | delta           |          | theta    |          | alpha    |          | low beta |          | high beta |          | low gamma |          |
|          | <i>F</i>        | <i>p</i> | <i>F</i> | <i>p</i> | <i>F</i> | <i>p</i> | <i>F</i> | <i>p</i> | <i>F</i>  | <i>p</i> | <i>F</i>  | <i>p</i> |
| Fp1      | 1.452           | 0.233    | 0.890    | 0.450    | 0.194    | 0.900    | 0.119    | 0.949    | 0.580     | 0.629    | 0.230     | 0.875    |
| Fp2      | 0.701           | 0.554    | 0.451    | 0.718    | 0.217    | 0.884    | 0.115    | 0.951    | 0.761     | 0.519    | 0.545     | 0.653    |
| F7       | 1.094           | 0.356    | 0.370    | 0.775    | 0.078    | 0.972    | 0.065    | 0.978    | 0.186     | 0.906    | 0.285     | 0.836    |
| F3       | 0.762           | 0.518    | 0.248    | 0.862    | 0.137    | 0.938    | 0.189    | 0.904    | 0.640     | 0.591    | 0.302     | 0.824    |
| F4       | 0.270           | 0.847    | 0.037    | 0.990    | 0.220    | 0.883    | 0.218    | 0.884    | 0.247     | 0.863    | 0.273     | 0.845    |
| F8       | 0.889           | 0.450    | 0.351    | 0.789    | 0.214    | 0.886    | 0.399    | 0.754    | 0.476     | 0.699    | 0.270     | 0.847    |
| Fz       | 0.618           | 0.605    | 0.312    | 0.817    | 0.140    | 0.936    | 0.212    | 0.888    | 0.220     | 0.882    | 0.460     | 0.711    |
| C4       | 0.243           | 0.866    | 0.486    | 0.693    | 0.320    | 0.811    | 0.318    | 0.812    | 0.301     | 0.825    | 0.710     | 0.549    |
| Cz       | 0.838           | 0.476    | 0.761    | 0.519    | 0.234    | 0.872    | 0.368    | 0.776    | 1.508     | 0.218    | 0.327     | 0.806    |
| P3       | 0.634           | 0.595    | 0.212    | 0.888    | 0.410    | 0.746    | 0.147    | 0.931    | 0.757     | 0.521    | 0.380     | 0.768    |
| P4       | 0.799           | 0.498    | 1.994    | 0.120    | 0.724    | 0.540    | 1.285    | 0.284    | 1.357     | 0.261    | 1.031     | 0.383    |
| Pz       | 0.327           | 0.806    | 0.410    | 0.746    | 1.620    | 0.190    | 0.408    | 0.747    | 1.094     | 0.356    | 0.460     | 0.711    |
| O1       | 0.194           | 0.900    | 0.346    | 0.792    | 0.110    | 0.954    | 0.035    | 0.991    | 0.111     | 0.954    | 0.334     | 0.801    |
| O2       | 0.243           | 0.866    | 0.486    | 0.693    | 0.320    | 0.811    | 0.318    | 0.812    | 0.301     | 0.825    | 0.710     | 0.549    |
| Oz       | 0.594           | 0.621    | 0.391    | 0.760    | 0.225    | 0.879    | 0.143    | 0.934    | 0.391     | 0.760    | 0.309     | 0.819    |

The values shown in the table are the statistical results of 2 groups x 4 recording times rmANOVA of each channel and frequency band. All statistical significances are larger than 0.05. EEG: electroencephalograph.
